# Supplementary material for: Delivery of healthcare provider’s lifestyle advice and lifestyle behavioural change in adults who were overweight or obese in pre-diabetes management in the USA: NHANES (2013–2018)
Source: HighWire-hosted journal article supplement (doi:10.1136/fmch-2021-001139), 2021-11-01
Supplement: fmch-2021-001139supp002_data_supplement.pdf [file fmch-2021-001139supp002_data_supplement.pdf]

Online Supplemental Table 2 Association between health care provider's advice and participants' behavior of lifestyle change to reduce the risk for diabetes after adjusting for participants' characteristics (n=1,039)

| Independent variables               | Dependent variable: lifestyle change, OR (95% CI) |                   |                   |
|-------------------------------------|---------------------------------------------------|-------------------|-------------------|
|                                     | Diet                                              | Exercise          | Losing weight     |
| <b>Health professional's advice</b> |                                                   |                   |                   |
| No                                  | 1.00                                              | 1.00              | 1.00              |
| Yes                                 | 3.00 (1.82, 4.96)                                 | 1.63 (1.12, 2.38) | 1.36 (0.86, 2.15) |
| <b>Age (years)</b>                  |                                                   |                   |                   |
| 20-44                               | 1.00                                              | 1.00              | 1.00              |
| 45-64                               | 0.92 (0.56, 1.49)                                 | 0.86 (0.48, 1.56) | 1.02 (0.63, 1.65) |
| 65+                                 | 1.12 (0.46, 2.74)                                 | 0.75 (0.41, 1.37) | 0.99 (0.57, 1.71) |
| <b>Gender (female)</b>              |                                                   |                   |                   |
| Male                                | 1.00                                              | 1.00              | 1.00              |
| Female                              | 1.41 (1.00, 2.01)                                 | 1.26 (0.84, 1.91) | 1.31 (0.78, 2.20) |
| <b>BMI</b>                          |                                                   |                   |                   |
| Overweight                          | 1.00                                              | 1.00              | 1.00              |
| Obese                               | 1.52 (1.00, 2.30)                                 | 0.79 (0.50, 1.24) | 1.31 (0.89, 1.94) |
| <b>Race</b>                         |                                                   |                   |                   |
| Non-Hispanic White                  | 1.00                                              | 1.00              | 1.00              |
| Non-Hispanic Black                  | 0.98 (0.59, 1.62)                                 | 1.13 (0.78, 1.62) | 0.88 (0.52, 1.47) |
| Hispanic                            | 1.00 (0.63, 1.59)                                 | 1.13 (0.78, 1.62) | 1.20 (0.74, 1.96) |
| Other                               | 0.69 (0.41, 1.17)                                 | 0.77 (0.46, 1.29) | 0.93 (0.45, 1.92) |
| <b>Education</b>                    |                                                   |                   |                   |
| Less than high school               | 1.00                                              | 1.00              | 1.00              |
| High school/GED                     | 1.02 (0.60, 1.74)                                 | 0.96 (0.65, 1.42) | 1.48 (0.71, 3.08) |
| Some college/associate degree       | 0.97 (0.56, 1.69)                                 | 1.07 (0.71, 1.62) | 1.61 (0.83, 3.10) |
| College graduate or above           | 1.56 (0.80, 3.07)                                 | 1.23 (0.67, 2.26) | 1.93 (0.80, 4.63) |
| <b>Family income</b>                |                                                   |                   |                   |
| Poor                                | 1.00                                              | 1.00              | 1.00              |
| Low                                 | 0.67 (0.38, 1.18)                                 | 0.91 (0.56, 1.49) | 0.85 (0.55, 1.32) |
| Medium                              | 0.95 (0.50, 1.79)                                 | 1.03 (0.60, 1.75) | 0.91 (0.51, 1.64) |
| High                                | 1.18 (0.61, 2.26)                                 | 0.98 (0.52, 1.82) | 0.99 (0.49, 2.20) |
| <b>Health insurance</b>             |                                                   |                   |                   |
| Private                             | 1.00                                              | 1.00              | 1.00              |
| Public                              | 0.89 (0.51, 1.53)                                 | 0.85 (0.44, 1.63) | 1.08 (0.58, 1.99) |
| Uninsured                           | 0.89 (0.51, 1.56)                                 | 1.12 (0.65, 1.93) | 0.82 (0.36, 1.87) |
| <b>Routine place for healthcare</b> |                                                   |                   |                   |
| No                                  | 1.00                                              | 1.00              | 1.00              |
| Yes                                 | 2.19 (1.09, 4.39)                                 | 1.21 (0.62, 2.37) | 1.53 (0.81, 2.88) |
| <b>Activity limitation</b>          |                                                   |                   |                   |
| No                                  | 1.00                                              | 1.00              | 1.00              |
| Yes                                 | 1.31 (0.83, 2.08)                                 | 0.79 (0.56, 1.11) | 1.17 (0.62, 2.19) |
| <b>Family history of diabetes</b>   |                                                   |                   |                   |
| No                                  | 1.00                                              | 1.00              | 1.00              |
| Yes                                 | 1.15 (0.71, 1.86)                                 | 1.26 (0.83, 1.92) | 0.83 (0.57, 1.20) |
| <b>History of CVD</b>               |                                                   |                   |                   |
